# Supplementary material for: Toxicity Investigations of (R)-3-Hydroxybutyrate Glycerides In Vitro and in Male and Female Rats
Source: MDPI journal article supplement (doi:10.3390/nu14204426), 2022-10-21
Supplement: s1 [file s1]

**Table S1.** Water consumption (ml/day) of male and female rats during the 90-day toxicity study of TCN006

| Day of Study   | Control       | 75,000 ppm     | 125,000 ppm     | 200,000 ppm      |
|----------------|---------------|----------------|-----------------|------------------|
| <b>Males</b>   |               |                |                 |                  |
| 0 → 3          | 39.00 ± 5.69  | 39.47 ± 9.81   | 30.27 ± 9.39*   | 13.47 ± 11.82*** |
| 3 → 7          | 60.05 ± 47.02 | 37.13 ± 4.27*  | 33.25 ± 10.75** | 33.30 ± 5.27***  |
| 7 → 10         | 43.53 ± 12.27 | 39.90 ± 5.74   | 42.90 ± 5.88    | 32.00 ± 4.86**   |
| 10 → 14        | 61.90 ± 40.19 | 41.23 ± 5.93   | 40.65 ± 5.49    | 37.05 ± 21.23*   |
| 14 → 17        | 46.30 ± 9.81  | 39.60 ± 5.14   | 38.97 ± 5.39    | 28.47 ± 3.87***  |
| 17 → 21        | 52.85 ± 25.80 | 40.40 ± 13.60  | 40.78 ± 11.66   | 28.98 ± 4.18***  |
| 21 → 24        | 49.53 ± 14.10 | 44.03 ± 7.82   | 43.93 ± 4.52    | 30.80 ± 3.95***  |
| 24 → 28        | 47.75 ± 11.82 | 45.18 ± 16.96  | 46.23 ± 5.90    | 32.20 ± 4.54***  |
| 28 → 31        | 47.93 ± 14.06 | 39.37 ± 7.07   | 42.87 ± 8.83    | 29.97 ± 6.15***  |
| 31 → 35        | 56.83 ± 19.57 | 43.28 ± 7.37   | 45.08 ± 5.60    | 32.88 ± 3.94***  |
| 35 → 38        | 51.30 ± 14.89 | 39.33 ± 8.71   | 40.97 ± 8.09    | 30.00 ± 3.46***  |
| 38 → 42        | 50.50 ± 20.25 | 42.10 ± 7.76   | 50.80 ± 20.86   | 30.88 ± 3.54***  |
| 42 → 45        | 51.50 ± 15.99 | 41.67 ± 5.92   | 44.23 ± 5.59    | 29.37 ± 7.33***  |
| 45 → 49        | 53.63 ± 18.14 | 44.25 ± 6.05   | 45.28 ± 8.62    | 31.88 ± 8.56***  |
| 49 → 52        | 48.97 ± 16.07 | 42.23 ± 8.48   | 45.70 ± 11.09   | 27.10 ± 3.67***  |
| 52 → 56        | 48.53 ± 11.84 | 41.13 ± 7.24   | 42.00 ± 7.13    | 32.35 ± 11.63*** |
| 56 → 59        | 56.73 ± 20.96 | 40.00 ± 5.56   | 41.83 ± 7.74    | 29.97 ± 3.88***  |
| 59 → 63        | 49.35 ± 12.16 | 42.43 ± 13.32  | 37.63 ± 7.43    | 30.38 ± 10.68*** |
| 63 → 66        | 52.17 ± 18.35 | 39.23 ± 6.73   | 41.60 ± 12.60   | 27.57 ± 3.55***  |
| 66 → 70        | 51.03 ± 16.09 | 40.80 ± 6.15   | 41.80 ± 5.64    | 28.50 ± 3.32***  |
| 70 → 73        | 52.00 ± 16.55 | 40.13 ± 9.05   | 38.73 ± 9.42    | 29.73 ± 10.29*** |
| 73 → 77        | 53.80 ± 18.63 | 39.25 ± 6.91   | 40.83 ± 6.52    | 28.93 ± 3.10***  |
| 77 → 80        | 50.03 ± 15.49 | 38.80 ± 7.98   | 39.73 ± 6.45    | 26.83 ± 2.53***  |
| 80 → 84        | 56.28 ± 27.28 | 40.53 ± 7.89   | 39.25 ± 8.50    | 28.98 ± 2.91***  |
| 84 → 87        | 52.77 ± 22.57 | 34.27 ± 7.63*  | 36.67 ± 8.99    | 25.83 ± 3.48***  |
| 87 → 91        | 53.50 ± 29.73 | 35.88 ± 7.11   | 36.65 ± 8.02    | 30.40 ± 10.39**  |
| <b>Females</b> |               |                |                 |                  |
| 0 → 3          | 31.27 ± 7.10  | 32.23 ± 7.94   | 23.40 ± 2.65**  | 16.07 ± 5.80***  |
| 3 → 7          | 60.58 ± 58.32 | 30.40 ± 9.41*  | 21.58 ± 4.78*** | 20.20 ± 6.56***  |
| 7 → 10         | 36.83 ± 8.87  | 32.10 ± 9.43   | 26.00 ± 6.36**  | 23.83 ± 3.79**   |
| 10 → 14        | 47.53 ± 16.19 | 34.18 ± 12.69* | 26.03 ± 3.70*** | 23.00 ± 3.55***  |
| 14 → 17        | 36.10 ± 7.92  | 31.63 ± 9.10   | 27.23 ± 9.91*   | 22.40 ± 4.01***  |
| 17 → 21        | 54.95 ± 23.95 | 35.15 ± 10.01* | 27.78 ± 6.66*** | 22.70 ± 3.59***  |
| 21 → 24        | 41.07 ± 10.56 | 35.50 ± 8.28   | 31.23 ± 4.90*   | 25.27 ± 4.67***  |
| 24 → 28        | 52.40 ± 29.21 | 37.05 ± 7.95   | 28.40 ± 5.99*** | 26.85 ± 3.39***  |
| 28 → 31        | 39.80 ± 11.07 | 36.80 ± 7.67   | 27.90 ± 5.22**  | 26.33 ± 3.62***  |
| 31 → 35        | 53.20 ± 12.43 | 39.55 ± 6.84   | 33.65 ± 9.24*** | 27.20 ± 5.12***  |
| 35 → 38        | 38.20 ± 10.08 | 33.60 ± 8.76   | 30.97 ± 6.12    | 24.37 ± 4.04***  |

|         |               |               |                  |                 |
|---------|---------------|---------------|------------------|-----------------|
| 38 → 42 | 71.15 ± 29.77 | 43.43 ± 17.30 | 31.60 ± 8.74***  | 27.15 ± 5.65*** |
| 42 → 45 | 45.80 ± 14.56 | 37.90 ± 10.69 | 30.10 ± 10.26**  | 27.53 ± 4.28**  |
| 45 → 49 | 58.43 ± 23.10 | 40.63 ± 8.28  | 32.88 ± 10.14*** | 27.05 ± 6.06*** |
| 49 → 52 | 49.97 ± 17.17 | 44.63 ± 14.33 | 29.07 ± 5.83***  | 24.67 ± 5.23*** |
| 52 → 56 | 51.30 ± 16.81 | 42.70 ± 9.66  | 33.75 ± 12.07**  | 24.93 ± 5.80*** |
| 56 → 59 | 52.97 ± 21.41 | 41.73 ± 8.34  | 32.70 ± 7.35**   | 25.07 ± 5.76*** |
| 59 → 63 | 58.70 ± 22.20 | 39.40 ± 7.93* | 28.58 ± 5.85***  | 24.95 ± 5.29*** |
| 63 → 66 | 53.87 ± 18.22 | 35.67 ± 7.90* | 31.03 ± 9.54***  | 27.27 ± 5.07*** |
| 66 → 70 | 56.53 ± 21.24 | 40.90 ± 9.46  | 33.43 ± 8.40**   | 29.35 ± 6.54*** |
| 70 → 73 | 63.30 ± 33.17 | 42.10 ± 11.62 | 30.60 ± 8.56***  | 25.70 ± 5.13*** |
| 73 → 77 | 61.15 ± 22.52 | 40.75 ± 9.16  | 31.23 ± 9.24***  | 27.35 ± 6.12*** |
| 77 → 80 | 45.13 ± 9.75  | 39.20 ± 10.70 | 28.47 ± 5.37***  | 26.80 ± 5.23*** |
| 80 → 84 | 55.83 ± 20.91 | 40.18 ± 9.55  | 31.60 ± 6.82***  | 26.68 ± 5.16*** |
| 84 → 87 | 48.07 ± 13.97 | 37.97 ± 9.76  | 24.20 ± 5.05***  | 25.93 ± 4.91*** |
| 87 → 91 | 48.48 ± 16.46 | 36.85 ± 10.88 | 28.80 ± 8.45**   | 24.90 ± 4.17*** |

N = 10/group. Data are presented as mean ± standard deviation (SD). ppm = parts per million

\*Significantly different from control,  $p < 0.05$ ; \*\*Significantly different from control,  $p < 0.01$ ;

\*\*\*Significantly different from control,  $p < 0.001$ .

**Table S2.** Mean daily body weight gain (g/day) of male and female rats during the 90-day toxicity study of TCN006

| Day of Study   | Control      | 75,000 ppm  | 125,000 ppm  | 200,000 ppm  |
|----------------|--------------|-------------|--------------|--------------|
| <b>Males</b>   |              |             |              |              |
| 0 → 7          | 5.39 ± 1.70  | 5.99 ± 0.65 | 5.14 ± 4.12  | 3.96 ± 1.65  |
| 7 → 14         | 3.04 ± 3.29  | 5.20 ± 0.65 | 6.26 ± 2.70  | 5.69 ± 1.02  |
| 14 → 21        | 5.23 ± 3.42  | 3.83 ± 0.60 | 3.79 ± 0.71  | 4.27 ± 0.58  |
| 21 → 28        | 3.13 ± 0.65  | 3.27 ± 0.52 | 3.44 ± 0.79  | 3.79 ± 0.39  |
| 28 → 35        | 2.44 ± 1.84  | 2.91 ± 0.88 | 3.11 ± 1.31  | 3.07 ± 0.71  |
| 35 → 42        | 2.66 ± 2.47  | 2.54 ± 0.59 | 2.91 ± 1.29  | 2.23 ± 0.45  |
| 42 → 49        | 2.23 ± 1.62  | 2.20 ± 0.74 | 2.34 ± 1.16  | 2.39 ± 0.67  |
| 49 → 56        | 1.41 ± 1.40  | 1.74 ± 0.80 | 1.70 ± 1.60  | 1.76 ± 0.76  |
| 56 → 63        | 1.71 ± 2.33  | 2.39 ± 0.46 | 1.73 ± 0.27  | 1.43 ± 0.79  |
| 63 → 70        | 2.11 ± 1.93  | 1.71 ± 0.62 | 1.59 ± 0.76  | 1.94 ± 0.58  |
| 70 → 77        | 1.14 ± 1.32  | 0.64 ± 0.53 | 1.09 ± 1.04  | 0.93 ± 0.51  |
| 77 → 84        | 1.79 ± 1.18  | 2.13 ± 0.60 | 2.33 ± 0.84  | 1.60 ± 0.68  |
| 84 → 91        | 0.64 ± 0.72  | 1.01 ± 0.74 | 1.37 ± 1.10  | 0.87 ± 0.59  |
| Marginal       | 2.53 ± 2.36  | 2.74 ± 1.61 | 2.83 ± 2.17  | 2.61 ± 1.59  |
| <b>Females</b> |              |             |              |              |
| 0 → 7          | 2.19 ± 0.82  | 2.54 ± 0.68 | 2.49 ± 1.80  | 0.84 ± 2.68  |
| 7 → 14         | 1.31 ± 1.41  | 1.84 ± 0.41 | 1.99 ± 1.27  | 3.17 ± 1.99  |
| 14 → 21        | 0.81 ± 1.15  | 0.83 ± 0.62 | 1.56 ± 1.40  | 1.34 ± 0.64  |
| 21 → 28        | 1.34 ± 1.48  | 1.57 ± 0.53 | 2.24 ± 1.22  | 1.71 ± 0.72  |
| 28 → 35        | 1.54 ± 1.57  | 1.63 ± 1.25 | 0.87 ± 0.82  | 1.10 ± 0.72  |
| 35 → 42        | 0.06 ± 1.09  | 0.79 ± 0.72 | 0.37 ± 1.83  | 1.30 ± 0.98  |
| 42 → 49        | 0.60 ± 1.03  | 0.47 ± 0.68 | 1.31 ± 0.84  | 0.73 ± 0.56  |
| 49 → 56        | 0.27 ± 2.10  | 0.84 ± 0.98 | 0.53 ± 1.18  | 0.77 ± 0.65  |
| 56 → 63        | 1.00 ± 2.08  | 0.94 ± 0.91 | 0.91 ± 1.44  | 0.59 ± 0.88  |
| 63 → 70        | 1.14 ± 0.89  | 0.56 ± 0.88 | 0.51 ± 0.92  | 1.00 ± 0.64  |
| 70 → 77        | 0.04 ± 1.01  | 0.41 ± 1.23 | 1.10 ± 0.80  | 0.31 ± 0.60  |
| 77 → 84        | 1.41 ± 0.75  | 0.36 ± 1.62 | 0.81 ± 0.67  | 0.94 ± 0.96  |
| 84 → 91        | -0.20 ± 1.00 | 0.29 ± 1.76 | -0.11 ± 0.96 | -0.06 ± 0.97 |
| Marginal       | 0.89 ± 1.43  | 1.01 ± 1.18 | 1.12 ± 1.38  | 1.06 ± 1.34  |

N = 10/group, except for marginal, which included N = 130/group. Data are presented as mean ± standard deviation (SD). ppm = parts per million. The marginal value is the mean ± SD for every interval. No significant differences were observed between test groups and the control group ( $p > 0.05$ ).

**Table S3.** Mean food consumption (g/day) of male and female rats during the 90-day toxicity study of TCN006

| Day of Study   | Control      | 75,000 ppm      | 125,000 ppm     | 200,000 ppm     |
|----------------|--------------|-----------------|-----------------|-----------------|
| <b>Males</b>   |              |                 |                 |                 |
| 0 → 7          | 26.47 ± 1.48 | 23.16 ± 2.05    | 20.53 ± 3.08    | 16.24 ± 2.42    |
| 7 → 14         | 26.13 ± 4.08 | 24.59 ± 1.97    | 23.17 ± 1.83    | 20.29 ± 1.70    |
| 14 → 21        | 29.03 ± 2.61 | 25.34 ± 2.05    | 23.74 ± 2.35    | 21.01 ± 1.38    |
| 21 → 28        | 28.80 ± 2.47 | 25.74 ± 1.86    | 23.86 ± 1.75    | 20.91 ± 1.66    |
| 28 → 35        | 28.43 ± 2.51 | 25.80 ± 2.94    | 23.71 ± 1.86    | 20.76 ± 2.99    |
| 35 → 42        | 29.37 ± 2.82 | 25.07 ± 1.86    | 23.94 ± 1.76    | 20.66 ± 1.46    |
| 42 → 49        | 28.97 ± 2.30 | 25.80 ± 2.07    | 23.16 ± 2.11    | 20.94 ± 1.23    |
| 49 → 56        | 29.37 ± 2.79 | 24.74 ± 1.85    | 24.09 ± 2.35    | 21.30 ± 1.29    |
| 56 → 63        | 28.23 ± 4.26 | 24.93 ± 2.25    | 22.56 ± 2.01    | 19.51 ± 1.21    |
| 63 → 70        | 28.66 ± 1.99 | 24.69 ± 1.96    | 22.63 ± 2.13    | 19.79 ± 1.27    |
| 70 → 77        | 28.34 ± 2.09 | 24.23 ± 2.21    | 22.90 ± 2.15    | 20.44 ± 0.93    |
| 77 → 84        | 28.01 ± 2.54 | 23.96 ± 1.52    | 22.83 ± 2.30    | 19.66 ± 0.98    |
| 84 → 91        | 26.64 ± 2.92 | 23.10 ± 2.59    | 21.33 ± 1.54    | 18.31 ± 1.11    |
| Marginal       | 28.19 ± 2.85 | 24.70 ± 2.20*   | 22.96 ± 2.26*   | 19.99 ± 2.04*   |
| <b>Females</b> |              |                 |                 |                 |
| 0 → 7          | 17.51 ± 1.29 | 15.47 ± 2.09**  | 14.23 ± 2.16*** | 11.46 ± 1.81*** |
| 7 → 14         | 18.40 ± 1.30 | 15.83 ± 1.70**  | 16.21 ± 1.00*   | 14.26 ± 1.30*** |
| 14 → 21        | 17.99 ± 2.05 | 16.00 ± 2.03    | 15.90 ± 1.82    | 14.53 ± 1.40*** |
| 21 → 28        | 18.49 ± 1.40 | 16.40 ± 2.47*   | 15.96 ± 3.04**  | 14.13 ± 1.19*** |
| 28 → 35        | 18.77 ± 1.98 | 16.01 ± 2.87*   | 15.41 ± 2.30**  | 13.76 ± 1.12*** |
| 35 → 42        | 18.34 ± 1.17 | 16.30 ± 2.16*   | 14.86 ± 1.56*** | 14.96 ± 2.10*** |
| 42 → 49        | 19.39 ± 0.89 | 15.34 ± 1.62*** | 15.19 ± 1.50*** | 14.23 ± 0.96*** |
| 49 → 56        | 18.59 ± 2.73 | 15.94 ± 2.73    | 15.00 ± 1.54**  | 14.21 ± 1.21*** |
| 56 → 63        | 18.91 ± 1.35 | 15.64 ± 1.46*** | 14.73 ± 1.25*** | 13.40 ± 0.87*** |
| 63 → 70        | 18.84 ± 1.10 | 15.20 ± 1.50*** | 14.63 ± 1.13*** | 13.54 ± 0.73*** |
| 70 → 77        | 18.91 ± 0.98 | 15.61 ± 1.26*** | 15.36 ± 1.74*** | 13.91 ± 1.15*** |
| 77 → 84        | 19.50 ± 1.51 | 15.33 ± 1.59*** | 15.13 ± 1.11*** | 13.69 ± 1.07*** |
| 84 → 91        | 17.33 ± 1.66 | 14.33 ± 2.72*** | 13.83 ± 1.29*** | 12.61 ± 0.79*** |
| Marginal       | 18.54 ± 1.62 | 15.65 ± 2.05    | 15.11 ± 1.78    | 13.75 ± 1.48    |

N = 10/group except for marginal, which included N = 130/group. Data are presented as mean ± standard deviation (SD). The marginal value is the mean ± SD for every interval. ppm = parts per million \*Significantly different from control,  $p < 0.05$ ; \*\*Significantly different from control,  $p < 0.01$ ; \*\*\*Significantly different from control,  $p < 0.001$ .

**Table S4.** Food Efficiency of male and female rats during the 90-day toxicity study of TCN006

| Day of Study   | Control        | 75,000 ppm     | 125,000 ppm    | 200,000 ppm    |
|----------------|----------------|----------------|----------------|----------------|
| <b>Males</b>   |                |                |                |                |
| 0 → 7          | 0.204 ± 0.064  | 0.259 ± 0.027  | 0.223 ± 0.249  | 0.237 ± 0.078  |
| 7 → 14         | 0.099 ± 0.140  | 0.213 ± 0.030  | 0.273 ± 0.123  | 0.280 ± 0.039  |
| 14 → 21        | 0.174 ± 0.095  | 0.151 ± 0.019  | 0.162 ± 0.037  | 0.204 ± 0.029  |
| 21 → 28        | 0.108 ± 0.015  | 0.127 ± 0.019  | 0.144 ± 0.027  | 0.181 ± 0.015  |
| 28 → 35        | 0.086 ± 0.066  | 0.112 ± 0.029  | 0.131 ± 0.056  | 0.146 ± 0.023  |
| 35 → 42        | 0.087 ± 0.078  | 0.102 ± 0.023  | 0.122 ± 0.055  | 0.108 ± 0.021  |
| 42 → 49        | 0.078 ± 0.058  | 0.085 ± 0.029  | 0.102 ± 0.052  | 0.114 ± 0.029  |
| 49 → 56        | 0.048 ± 0.047  | 0.069 ± 0.032  | 0.070 ± 0.069  | 0.082 ± 0.033  |
| 56 → 63        | 0.049 ± 0.105  | 0.096 ± 0.018  | 0.078 ± 0.016  | 0.073 ± 0.040  |
| 63 → 70        | 0.074 ± 0.069  | 0.069 ± 0.024  | 0.070 ± 0.032  | 0.097 ± 0.026  |
| 70 → 77        | 0.040 ± 0.046  | 0.026 ± 0.021  | 0.047 ± 0.046  | 0.045 ± 0.025  |
| 77 → 84        | 0.064 ± 0.043  | 0.090 ± 0.027  | 0.102 ± 0.034  | 0.082 ± 0.033  |
| 84 → 91        | 0.026 ± 0.025  | 0.042 ± 0.029  | 0.064 ± 0.048  | 0.047 ± 0.032  |
| Marginal       | 0.088 ± 0.085  | 0.111 ± 0.067* | 0.122 ± 0.105* | 0.130 ± 0.079* |
| <b>Females</b> |                |                |                |                |
| 0 → 7          | 0.125 ± 0.047  | 0.163 ± 0.033  | 0.159 ± 0.134  | 0.038 ± 0.312  |
| 7 → 14         | 0.068 ± 0.071  | 0.119 ± 0.035  | 0.121 ± 0.079  | 0.223 ± 0.144  |
| 14 → 21        | 0.043 ± 0.064  | 0.052 ± 0.042  | 0.096 ± 0.074  | 0.093 ± 0.047  |
| 21 → 28        | 0.071 ± 0.076  | 0.096 ± 0.028  | 0.135 ± 0.047  | 0.119 ± 0.043  |
| 28 → 35        | 0.076 ± 0.066  | 0.094 ± 0.059  | 0.055 ± 0.054  | 0.078 ± 0.048  |
| 35 → 42        | 0.003 ± 0.059  | 0.052 ± 0.049  | 0.019 ± 0.119  | 0.087 ± 0.070  |
| 42 → 49        | 0.032 ± 0.055  | 0.030 ± 0.046  | 0.087 ± 0.054  | 0.052 ± 0.039  |
| 49 → 56        | -0.001 ± 0.132 | 0.046 ± 0.064  | 0.034 ± 0.076  | 0.052 ± 0.042  |
| 56 → 63        | 0.048 ± 0.101  | 0.060 ± 0.059  | 0.059 ± 0.090  | 0.041 ± 0.064  |
| 63 → 70        | 0.060 ± 0.044  | 0.036 ± 0.057  | 0.034 ± 0.061  | 0.073 ± 0.047  |
| 70 → 77        | 0.002 ± 0.056  | 0.027 ± 0.078  | 0.073 ± 0.055  | 0.023 ± 0.044  |
| 77 → 84        | 0.071 ± 0.037  | 0.020 ± 0.105  | 0.054 ± 0.046  | 0.066 ± 0.070  |
| 84 → 91        | -0.014 ± 0.057 | 0.003 ± 0.160  | -0.010 ± 0.071 | -0.006 ± 0.078 |
| Marginal       | 0.045 ± 0.078  | 0.061 ± 0.081* | 0.071 ± 0.088* | 0.072 ± 0.116* |

N = 10/group, except for marginal, which included N = 130/group. Data are presented as mean ± standard deviation (SD). The marginal value is the mean ± SD for every interval. ppm = parts per million \*Significantly different from control,  $p < 0.05$ .

**Table S5.** Hematology and coagulation data for the 90-day toxicity study of TCN006 in rats

| Parameter                 | Control        | 75,000 ppm      | 125,000 ppm    | 200,000 ppm     |
|---------------------------|----------------|-----------------|----------------|-----------------|
| <b>Males</b>              |                |                 |                |                 |
| RBC (10 <sup>6</sup> /μL) | 9.200 ± 0.626  | 9.194 ± 0.714   | 9.152 ± 0.474  | 9.101 ± 0.395   |
| HGB (g/dL)                | 15.14 ± 0.58   | 14.85 ± 1.11    | 14.91 ± 0.90   | 15.34 ± 0.62    |
| HCT (%)                   | 45.97 ± 1.83   | 45.86 ± 3.32    | 45.68 ± 2.92   | 47.12 ± 1.68    |
| MCV (fL)                  | 50.20 ± 1.94   | 49.81 ± 1.62    | 49.92 ± 1.84   | 51.50 ± 1.34    |
| MCH (pg)                  | 16.53 ± 0.89   | 16.63 ± 1.16    | 16.30 ± 0.63   | 17.15 ± 0.77    |
| MCHC (g/dL)               | 32.97 ± 0.50   | 33.02 ± 1.89    | 32.63 ± 0.56   | 33.32 ± 1.72    |
| RDW (%)                   | 12.38 ± 0.35   | 12.64 ± 0.58    | 12.83 ± 0.41   | 12.87 ± 0.59    |
| RET (10 <sup>3</sup> /μL) | 168.22 ± 15.59 | 174.78 ± 27.27  | 188.90 ± 28.32 | 180.61 ± 31.78  |
| PLT (10 <sup>3</sup> /μL) | 1281.0 ± 221.3 | 1121.6 ± 265.1  | 1311.5 ± 254.8 | 1266.9 ± 293.0  |
| WBC (10 <sup>3</sup> /μL) | 6.918 ± 1.213  | 7.461 ± 2.347   | 8.601 ± 2.536  | 8.162 ± 2.897   |
| LYM (10 <sup>3</sup> /μL) | 4.848 ± 1.004  | 4.895 ± 1.642   | 6.059 ± 1.999  | 5.890 ± 2.538   |
| NEU (10 <sup>3</sup> /μL) | 1.579 ± 0.392  | 1.954 ± 0.725   | 1.901 ± 0.491  | 1.690 ± 0.359   |
| EOS (10 <sup>3</sup> /μL) | 0.192 ± 0.055  | 0.218 ± 0.049   | 0.276 ± 0.194  | 0.231 ± 0.058   |
| MON (10 <sup>3</sup> /μL) | 0.238 ± 0.083  | 0.290 ± 0.137   | 0.216 ± 0.080  | 0.263 ± 0.076   |
| BAS (10 <sup>3</sup> /μL) | 0.026 ± 0.005  | 0.022 ± 0.019   | 0.052 ± 0.041  | 0.033 ± 0.019   |
| LUC (10 <sup>3</sup> /μL) | 0.032 ± 0.013  | 0.041 ± 0.022   | 0.041 ± 0.015  | 0.038 ± 0.016   |
| APTT (s)                  | 15.06 ± 1.71   | 15.65 ± 1.27    | 15.81 ± 1.28   | 15.81 ± 1.07    |
| PT (s)                    | 9.80 ± 0.18    | 9.78 ± 0.26     | 9.87 ± 0.21    | 9.89 ± 0.10     |
| <b>Females</b>            |                |                 |                |                 |
| RBC (10 <sup>6</sup> /μL) | 8.052 ± 1.480  | 8.477 ± 0.427   | 8.261 ± 0.551  | 8.138 ± 0.536   |
| HGB (g/dL)                | 14.22 ± 2.63   | 14.81 ± 0.55    | 14.63 ± 1.03   | 14.49 ± 0.80    |
| HCT (%)                   | 42.22 ± 7.94   | 46.03 ± 1.70    | 44.33 ± 3.10   | 44.17 ± 2.14    |
| MCV (fL)                  | 52.40 ± 1.40   | 53.64 ± 1.85    | 53.56 ± 1.78   | 54.30 ± 1.35    |
| MCH (pg)                  | 17.65 ± 0.53   | 17.34 ± 0.82    | 17.85 ± 1.04   | 17.80 ± 0.54    |
| MCHC (g/dL)               | 33.70 ± 0.34   | 32.32 ± 0.65*** | 33.32 ± 1.14*  | 32.79 ± 0.52*** |
| RDW (%)                   | 11.01 ± 0.26   | 11.33 ± 0.66    | 11.45 ± 0.32*  | 11.44 ± 0.39*   |
| RET (10 <sup>3</sup> /μL) | 145.65 ± 33.25 | 151.04 ± 36.02  | 184.43 ± 39.77 | 163.39 ± 36.47  |
| PLT (10 <sup>3</sup> /μL) | 1083.9 ± 501.0 | 1352.4 ± 285.5  | 1327.3 ± 241.4 | 1236.8 ± 310.3  |
| WBC (10 <sup>3</sup> /μL) | 3.577 ± 1.419  | 3.833 ± 1.222   | 4.367 ± 1.757  | 3.865 ± 1.383   |
| LYM (10 <sup>3</sup> /μL) | 2.515 ± 1.208  | 2.738 ± 1.030   | 3.175 ± 1.564  | 2.802 ± 1.011   |
| NEU (10 <sup>3</sup> /μL) | 0.816 ± 0.303  | 0.815 ± 0.287   | 0.935 ± 0.270  | 0.804 ± 0.320   |
| EOS (10 <sup>3</sup> /μL) | 0.146 ± 0.095  | 0.146 ± 0.066   | 0.115 ± 0.073  | 0.116 ± 0.042   |
| MON (10 <sup>3</sup> /μL) | 0.072 ± 0.066  | 0.103 ± 0.052   | 0.106 ± 0.050  | 0.114 ± 0.057   |
| BAS (10 <sup>3</sup> /μL) | 0.013 ± 0.012  | 0.014 ± 0.012   | 0.019 ± 0.013  | 0.011 ± 0.010   |
| LUC (10 <sup>3</sup> /μL) | 0.015 ± 0.008  | 0.015 ± 0.008   | 0.019 ± 0.012  | 0.018 ± 0.012   |
| APTT (s)                  | 14.34 ± 1.94   | 15.52 ± 0.80    | 14.83 ± 1.96   | 14.74 ± 1.64    |
| PT (s)                    | 9.43 ± 0.41    | 9.70 ± 0.41     | 9.85 ± 0.34    | 9.78 ± 0.40     |

N = 10/group. Data are presented as mean ± standard deviation (SD). \*Significantly different from control, p<0.05; \*\*\*Significantly different from control, p<0.001. APTT = activated partial thromboplastin time; BAS = basophils; bw = body weight; dL = deciliter; EOS = eosinophils; fL = femtoliter; HCT = hematocrit;

HGB = hemoglobin; kg = kilogram; LUC = large unstained cells; LYM = lymphocytes; MCH = mean corpuscular hemoglobin; MCHC = mean corpuscular hemoglobin concentration; MCV = mean corpuscular volume; mg = milligrams; MON = monocytes; NEU = neutrophils; pg = picograms; PLT = platelets; ppm = parts per million; PT = prothrombin time; RBC = erythrocytes; RDW = red blood cell distribution width; RET = reticulocytes; s = seconds; WBC = white blood cells (leukocytes);  $\mu\text{L}$  = microliter.

**Table S6.** Urinalysis data for the 90-day toxicity study of TCN006 in rats

| Parameter            | Control       | 75,000 ppm    | 125,000 ppm   | 200,000 ppm   |
|----------------------|---------------|---------------|---------------|---------------|
| <b>Males</b>         |               |               |               |               |
| Urine volume (mL)    | 11.10 ± 9.45  | 13.95 ± 9.58  | 10.65 ± 8.46  | 16.15 ± 9.17  |
| pH                   | 7.00 ± 0.71   | 6.95 ± 0.50   | 7.30 ± 0.86   | 7.15 ± 0.41   |
| Glucose (mg/dL)      | 0.00 ± 0.00   | 0.00 ± 0.00   | 0.00 ± 0.00   | 0.00 ± 0.00   |
| Ketones (mg/dL)      | 4.0 ± 2.1     | 7.0 ± 12.5    | 11.5 ± 11.8   | 1.5 ± 2.4     |
| Protein (mg/dL)      | 22.5 ± 10.6   | 28.0 ± 27.2   | 43.5 ± 39.4   | 22.5 ± 7.9    |
| Specific Gravity     | 1.017 ± 0.008 | 1.014 ± 0.009 | 1.016 ± 0.009 | 1.011 ± 0.003 |
| Urobilinogen (EU/dL) | 0.20 ± 0.00   | 0.20 ± 0.00   | 0.20 ± 0.00   | 0.20 ± 0.00   |
| <b>Females</b>       |               |               |               |               |
| Urine volume (mL)    | 5.12 ± 8.29   | 4.62 ± 4.91   | 2.74 ± 3.05   | 4.44 ± 4.89   |
| pH                   | 6.60 ± 0.77   | 6.30 ± 0.26   | 6.56 ± 0.46   | 6.44 ± 0.58   |
| Glucose (mg/dL)      | 0.00 ± 0.00   | 0.00 ± 0.00   | 0.00 ± 0.00   | 0.00 ± 0.00   |
| Ketones (mg/dL)      | 1.5 ± 2.4     | 2.0 ± 2.6     | 2.2 ± 5.1     | 0.0 ± 0.0     |
| Protein (mg/dL)      | 52.0 ± 42.3   | 29.0 ± 39.2   | 52.8 ± 46.0   | 24.4 ± 31.2   |
| Specific Gravity     | 1.023 ± 0.010 | 1.021 ± 0.010 | 1.022 ± 0.008 | 1.021 ± 0.009 |
| Urobilinogen (EU/dL) | 0.20 ± 0.00   | 0.20 ± 0.00   | 0.20 ± 0.00   | 0.20 ± 0.00   |

N = 10/group for all groups except N = 9/group for 125,000 and 250,000 ppm females. Data are presented as mean ± standard deviation (SD). No significant differences were observed between test groups and the control group ( $p > 0.05$ ). dL = deciliter; EU = Ehrlich unit; mg = milligrams; ppm = parts per million.
